# Supplementary material for: Boll characteristics and yield of cotton in relation to the canopy microclimate under varying plant densities in an arid area
Source: PeerJ. 2021 Dec 2;9:e12111. doi: 10.7717/peerj.12111 (PMC8645204; doi:10.7717/peerj.12111)
Supplement: Supplemental Information 1 [file peerj-09-12111-s001.xlsx]

## Sheet: Fig.3-Light interception (LI)
Year	Treatment	Growth period	Layer	LI	Standard error
2019	P1	Budding	upper	0.12205	0.000368614
2019	P2	Budding	upper	0.10676	0.000551131
2019	P3	Budding	upper	0.11226	0.00050161
2019	P4	Budding	upper	0.11045	0.000544727
2019	P5	Budding	upper	0.11778	0.000609541
2019	P6	Budding	upper	0.11599	0.000621003
2019	P1	Budding	middle	0.13273	0.00661
2019	P2	Budding	middle	0.14172	0.0106
2019	P3	Budding	middle	0.18496	0.01934
2019	P4	Budding	middle	0.21382	0.02608
2019	P5	Budding	middle	0.18398	0.02251
2019	P6	Budding	middle	0.21235	0.02246
2019	P1	Budding	lower	0.30143	0.02857
2019	P2	Budding	lower	0.36585	0.05539
2019	P3	Budding	lower	0.5165	0.06716
2019	P4	Budding	lower	0.51727	0.06263
2019	P5	Budding	lower	0.53036	0.07514
2019	P6	Budding	lower	0.64642	0.06104
2019	P1	Full squaring	upper	0.22215	0.00488
2019	P2	Full squaring	upper	0.23829	0.00674
2019	P3	Full squaring	upper	0.24864	0.01064
2019	P4	Full squaring	upper	0.22561	0.00853
2019	P5	Full squaring	upper	0.28202	0.01146
2019	P6	Full squaring	upper	0.26258	0.00938
2019	P1	Full squaring	middle	0.39896	0.03366
2019	P2	Full squaring	middle	0.59209	0.05257
2019	P3	Full squaring	middle	0.63176	0.05325
2019	P4	Full squaring	middle	0.54427	0.07138
2019	P5	Full squaring	middle	0.62809	0.04466
2019	P6	Full squaring	middle	0.62499	0.05406
2019	P1	Full squaring	lower	0.5371	0.04406
2019	P2	Full squaring	lower	0.74702	0.05349
2019	P3	Full squaring	lower	0.75341	0.04241
2019	P4	Full squaring	lower	0.83813	0.03571
2019	P5	Full squaring	lower	0.81876	0.02716
2019	P6	Full squaring	lower	0.88408	0.01121
2019	P1	Full blooming	upper	0.50123	0.01629
2019	P2	Full blooming	upper	0.59806	0.04213
2019	P3	Full blooming	upper	0.62166	0.03801
2019	P4	Full blooming	upper	0.63171	0.04455
2019	P5	Full blooming	upper	0.50254	0.04606
2019	P6	Full blooming	upper	0.35479	0.03735
2019	P1	Full blooming	middle	0.68122	0.03608
2019	P2	Full blooming	middle	0.74792	0.03533
2019	P3	Full blooming	middle	0.83439	0.01873
2019	P4	Full blooming	middle	0.89364	0.00574
2019	P5	Full blooming	middle	0.9172	0.00475
2019	P6	Full blooming	middle	0.85577	0.01095
2019	P1	Full blooming	lower	0.81921	0.02418
2019	P2	Full blooming	lower	0.85232	0.01511
2019	P3	Full blooming	lower	0.94996	0.000456364
2019	P4	Full blooming	lower	0.95748	0.000151579
2019	P5	Full blooming	lower	0.96955	4.67135e-05
2019	P6	Full blooming	lower	0.90331	0.0053
2019	P1	Full bolling	upper	0.52436	0.04679
2019	P2	Full bolling	upper	0.54396	0.02825
2019	P3	Full bolling	upper	0.56472	0.02025
2019	P4	Full bolling	upper	0.52512	0.01712
2019	P5	Full bolling	upper	0.66138	0.05763
2019	P6	Full bolling	upper	0.52465	0.03533
2019	P1	Full bolling	middle	0.80014	0.01855
2019	P2	Full bolling	middle	0.85025	0.01168
2019	P3	Full bolling	middle	0.83331	0.01007
2019	P4	Full bolling	middle	0.80596	0.01264
2019	P5	Full bolling	middle	0.93597	0.00165
2019	P6	Full bolling	middle	0.89205	0.00522
2019	P1	Full bolling	lower	0.90505	0.00139
2019	P2	Full bolling	lower	0.91889	0.00121
2019	P3	Full bolling	lower	0.91855	0.00155
2019	P4	Full bolling	lower	0.93493	0.000758458
2019	P5	Full bolling	lower	0.95585	8.88943e-05
2019	P6	Full bolling	lower	0.94701	0.000179208
2019	P1	Boll opening	upper	0.32349	0.02748
2019	P2	Boll opening	upper	0.30659	0.01966
2019	P3	Boll opening	upper	0.22369	0.01111
2019	P4	Boll opening	upper	0.34147	0.04894
2019	P5	Boll opening	upper	0.29326	0.01957
2019	P6	Boll opening	upper	0.23201	0.00701
2019	P1	Boll opening	middle	0.54007	0.02798
2019	P2	Boll opening	middle	0.65031	0.03542
2019	P3	Boll opening	middle	0.52418	0.04608
2019	P4	Boll opening	middle	0.71169	0.04653
2019	P5	Boll opening	middle	0.55094	0.02745
2019	P6	Boll opening	middle	0.4882	0.03209
2019	P1	Boll opening	lower	0.56174	0.04952
2019	P2	Boll opening	lower	0.62246	0.04887
2019	P3	Boll opening	lower	0.87264	0.00405
2019	P4	Boll opening	lower	0.67176	0.0466
2019	P5	Boll opening	lower	0.82038	0.02079
2019	P6	Boll opening	lower	0.78211	0.03582
2020	P1	Budding	upper	0.11737	0.000460016
2020	P2	Budding	upper	0.12209	0.000560918
2020	P3	Budding	upper	0.11698	0.000448564
2020	P4	Budding	upper	0.11327	0.000497622
2020	P5	Budding	upper	0.11808	0.000511818
2020	P6	Budding	upper	0.11163	0.00050922
2020	P1	Budding	middle	0.11227	0.00422
2020	P2	Budding	middle	0.12417	0.00342
2020	P3	Budding	middle	0.12157	0.00647
2020	P4	Budding	middle	0.15878	0.0134
2020	P5	Budding	middle	0.14479	0.00794
2020	P6	Budding	middle	0.15198	0.00865
2020	P1	Budding	lower	0.28966	0.03765
2020	P2	Budding	lower	0.32927	0.05023
2020	P3	Budding	lower	0.37206	0.05774
2020	P4	Budding	lower	0.37039	0.04925
2020	P5	Budding	lower	0.39694	0.05559
2020	P6	Budding	lower	0.47749	0.04146
2020	P1	Full squaring	upper	0.12211	0.00292
2020	P2	Full squaring	upper	0.12969	0.00906
2020	P3	Full squaring	upper	0.12006	0.00262
2020	P4	Full squaring	upper	0.10752	0.00479
2020	P5	Full squaring	upper	0.12144	0.00924
2020	P6	Full squaring	upper	0.16356	0.01138
2020	P1	Full squaring	middle	0.40883	0.03791
2020	P2	Full squaring	middle	0.53265	0.06579
2020	P3	Full squaring	middle	0.38152	0.04911
2020	P4	Full squaring	middle	0.48233	0.05878
2020	P5	Full squaring	middle	0.54205	0.08195
2020	P6	Full squaring	middle	0.73654	0.03393
2020	P1	Full squaring	lower	0.64031	0.02212
2020	P2	Full squaring	lower	0.66543	0.07186
2020	P3	Full squaring	lower	0.79892	0.03178
2020	P4	Full squaring	lower	0.84277	0.01403
2020	P5	Full squaring	lower	0.83456	0.02449
2020	P6	Full squaring	lower	0.86008	0.00487
2020	P1	Full blooming	upper	0.17137	0.02505
2020	P2	Full blooming	upper	0.18905	0.0332
2020	P3	Full blooming	upper	0.20009	0.02866
2020	P4	Full blooming	upper	0.22328	0.03222
2020	P5	Full blooming	upper	0.27265	0.04468
2020	P6	Full blooming	upper	0.35141	0.0128
2020	P1	Full blooming	middle	0.59124	0.03345
2020	P2	Full blooming	middle	0.67855	0.03046
2020	P3	Full blooming	middle	0.70135	0.04059
2020	P4	Full blooming	middle	0.72856	0.0309
2020	P5	Full blooming	middle	0.77804	0.02145
2020	P6	Full blooming	middle	0.75141	0.03611
2020	P1	Full blooming	lower	0.82895	0.00489
2020	P2	Full blooming	lower	0.88581	0.00771
2020	P3	Full blooming	lower	0.94614	0.00214
2020	P4	Full blooming	lower	0.95364	0.00111
2020	P5	Full blooming	lower	0.96334	0.000597019
2020	P6	Full blooming	lower	0.96855	0.000701387
2020	P1	Full bolling	upper	0.2803	0.03691
2020	P2	Full bolling	upper	0.28637	0.03971
2020	P3	Full bolling	upper	0.29639	0.02339
2020	P4	Full bolling	upper	0.28069	0.01649
2020	P5	Full bolling	upper	0.25112	0.01505
2020	P6	Full bolling	upper	0.32695	0.03789
2020	P1	Full bolling	middle	0.72667	0.01685
2020	P2	Full bolling	middle	0.79316	0.01297
2020	P3	Full bolling	middle	0.69827	0.0248
2020	P4	Full bolling	middle	0.6598	0.03933
2020	P5	Full bolling	middle	0.72185	0.02532
2020	P6	Full bolling	middle	0.82149	0.01605
2020	P1	Full bolling	lower	0.89557	0.000924429
2020	P2	Full bolling	lower	0.91535	0.0012
2020	P3	Full bolling	lower	0.95196	0.000797302
2020	P4	Full bolling	lower	0.95337	0.00112
2020	P5	Full bolling	lower	0.96144	0.000814412
2020	P6	Full bolling	lower	0.96842	0.000328081
2020	P1	Boll opening	upper	0.09872	0.01808
2020	P2	Boll opening	upper	0.13318	0.04338
2020	P3	Boll opening	upper	0.19436	0.03658
2020	P4	Boll opening	upper	0.27865	0.03996
2020	P5	Boll opening	upper	0.20185	0.02226
2020	P6	Boll opening	upper	0.13808	0.02243
2020	P1	Boll opening	middle	0.35442	0.00922
2020	P2	Boll opening	middle	0.55436	0.01529
2020	P3	Boll opening	middle	0.55552	0.01305
2020	P4	Boll opening	middle	0.57556	0.00674
2020	P5	Boll opening	middle	0.48175	0.00295
2020	P6	Boll opening	middle	0.42567	0.00992
2020	P1	Boll opening	lower	0.64873	0.00224
2020	P2	Boll opening	lower	0.75189	0.00276
2020	P3	Boll opening	lower	0.87147	0.000883561
2020	P4	Boll opening	lower	0.90193	0.000425116
2020	P5	Boll opening	lower	0.79335	0.000569628
2020	P6	Boll opening	lower	0.80877	0.000574566

## Sheet:  Fig.4-Temperature (T)
Year	Treatment	Repetitions	Growth period	Layer	Temperature	Average T	Standard error
2019	CK	1	full squaring	/	27.6
2019	CK	2	full squaring	/	27.54	27.57	0.0424264
2019	P1	1	full squaring	upper	36.63
2019	P1	2	full squaring	upper	36.41	36.52	0.155563
2019	P2	1	full squaring	upper	37.18
2019	P2	2	full squaring	upper	35.9	36.54	0.905097
2019	P3	1	full squaring	upper	35.5
2019	P3	2	full squaring	upper	35.06	35.28	0.311127
2019	P4	1	full squaring	upper	34.5
2019	P4	2	full squaring	upper	33.9	34.2	0.424264
2019	P5	1	full squaring	upper	33.3
2019	P5	2	full squaring	upper	33	33.15	0.212132
2019	P6	1	full squaring	upper	32.08
2019	P6	2	full squaring	upper	31.7	31.89	0.268701
2019	P1	1	full squaring	minddle	32.78
2019	P1	2	full squaring	minddle	32.3	32.54	0.339411
2019	P2	1	full squaring	minddle	32
2019	P2	2	full squaring	minddle	31	31.5	0.707107
2019	P3	1	full squaring	minddle	31
2019	P3	2	full squaring	minddle	30.74	30.87	0.183848
2019	P4	1	full squaring	minddle	31
2019	P4	2	full squaring	minddle	29.26	30.13	1.23037
2019	P5	1	full squaring	minddle	30
2019	P5	2	full squaring	minddle	29.44	29.72	0.39598
2019	P6	1	full squaring	minddle	29
2019	P6	2	full squaring	minddle	28.74	28.87	0.183848
2019	P1	1	full squaring	lower	32
2019	P1	2	full squaring	lower	30.44	31.22	1.10309
2019	P2	1	full squaring	lower	31
2019	P2	2	full squaring	lower	30	30.5	0.707107
2019	P3	1	full squaring	lower	30.8
2019	P3	2	full squaring	lower	29.24	30.02	1.10309
2019	P4	1	full squaring	lower	30
2019	P4	2	full squaring	lower	28.6	29.3	0.989949
2019	P5	1	full squaring	lower	29
2019	P5	2	full squaring	lower	29.04	29.02	0.0282843
2019	P6	1	full squaring	lower	29
2019	P6	2	full squaring	lower	27.86	28.43	0.806102
2019	CK	1	full blooming	/	32
2019	CK	2	full blooming	/	30.4	31.2	1.13137
2019	P1	1	full blooming	upper	41
2019	P1	2	full blooming	upper	40.3	40.65	0.494975
2019	P2	1	full blooming	upper	40
2019	P2	2	full blooming	upper	38.52	39.26	1.04652
2019	P3	1	full blooming	upper	38
2019	P3	2	full blooming	upper	37.48	37.74	0.367696
2019	P4	1	full blooming	upper	37.24
2019	P4	2	full blooming	upper	35.98	36.61	0.890955
2019	P5	1	full blooming	upper	36.2
2019	P5	2	full blooming	upper	35.06	35.63	0.806102
2019	P6	1	full blooming	upper	35.78
2019	P6	1	full blooming	upper	34.3	35.04	1.04652
2019	P1	1	full blooming	minddle	34.86
2019	P1	2	full blooming	minddle	34.1	34.48	0.537401
2019	P2	1	full blooming	minddle	34.08
2019	P2	2	full blooming	minddle	33.7	33.89	0.268701
2019	P3	1	full blooming	minddle	34.12
2019	P3	2	full blooming	minddle	32.69	33.405	1.01116
2019	P4	1	full blooming	minddle	33.22
2019	P4	2	full blooming	minddle	32.86	33.04	0.254558
2019	P5	1	full blooming	minddle	31.95
2019	P5	2	full blooming	minddle	32.19	32.07	0.169706
2019	P6	1	full blooming	minddle	31
2019	P6	2	full blooming	minddle	30.78	30.89	0.155563
2019	P1	1	full blooming	lower	33.16
2019	P1	2	full blooming	lower	31.88	32.52	0.905097
2019	P2	1	full blooming	lower	32
2019	P2	2	full blooming	lower	31.4	31.7	0.424264
2019	P3	1	full blooming	lower	31.92
2019	P3	2	full blooming	lower	31.16	31.54	0.537401
2019	P4	1	full blooming	lower	31.96
2019	P4	2	full blooming	lower	30.9	31.43	0.749533
2019	P5	1	full blooming	lower	30.74
2019	P5	2	full blooming	lower	29.92	30.33	0.579828
2019	P6	1	full blooming	lower	28.92
2019	P6	2	full blooming	lower	28.04	28.48	0.622254
2019	CK	1	full bolling	/	31.1
2019	CK	2	full bolling	/	30.08	30.59	0.721249
2019	P1	1	full bolling	upper	40.72
2019	P1	2	full bolling	upper	40.14	40.43	0.410122
2019	P2	1	full bolling	upper	39.2
2019	P2	2	full bolling	upper	38.4	38.8	0.565685
2019	P3	1	full bolling	upper	38.01
2019	P3	2	full bolling	upper	37.03	37.52	0.692965
2019	P4	1	full bolling	upper	36.14
2019	P4	2	full bolling	upper	36.6	36.37	0.325269
2019	P5	1	full bolling	upper	35.26
2019	P5	2	full bolling	upper	34.7	34.98	0.39598
2019	P6	1	full bolling	upper	33.98
2019	P6	2	full bolling	upper	34.16	34.07	0.127279
2019	P1	1	full bolling	minddle	33.2
2019	P1	2	full bolling	minddle	32.4	32.8	0.565685
2019	P2	1	full bolling	minddle	32.01
2019	P2	2	full bolling	minddle	31.59	31.8	0.296985
2019	P3	1	full bolling	minddle	31.09
2019	P3	2	full bolling	minddle	31.77	31.43	0.480833
2019	P4	1	full bolling	minddle	30
2019	P4	2	full bolling	minddle	31.6	30.8	1.13137
2019	P5	1	full bolling	minddle	30.8
2019	P5	2	full bolling	minddle	30.06	30.43	0.523259
2019	P6	1	full bolling	minddle	30
2019	P6	2	full bolling	minddle	29.78	29.89	0.155563
2019	P1	1	full bolling	lower	31.08
2019	P1	2	full bolling	lower	31.1	31.09	0.0141421
2019	P2	1	full bolling	lower	30.6
2019	P2	2	full bolling	lower	30.08	30.34	0.367696
2019	P3	1	full bolling	lower	29.06
2019	P3	2	full bolling	lower	28.8	28.93	0.183848
2019	P4	1	full bolling	lower	28.32
2019	P4	2	full bolling	lower	28.12	28.22	0.141421
2019	P5	1	full bolling	lower	29.07
2019	P5	2	full bolling	lower	29.27	29.17	0.141421
2019	P6	1	full bolling	lower	29.06
2019	P6	2	full bolling	lower	28.6	28.83	0.325269
2019	CK	1	boll opening	/	25.18
2019	CK	2	boll opening	/	25.58	25.38	0.282843
2019	P1	1	boll opening	upper	34.38
2019	P1	2	boll opening	upper	33.96	34.17	0.296985
2019	P2	1	boll opening	upper	33.9
2019	P2	2	boll opening	upper	33.8	33.85	0.0707107
2019	P3	1	boll opening	upper	33.55
2019	P3	2	boll opening	upper	33.49	33.52	0.0424264
2019	P4	1	boll opening	upper	33.27
2019	P4	2	boll opening	upper	33.55	33.41	0.19799
2019	P5	1	boll opening	upper	33.82
2019	P5	2	boll opening	upper	33.4	33.61	0.296985
2019	P6	1	boll opening	upper	32
2019	P6	2	boll opening	upper	32.18	32.09	0.127279
2019	P1	1	boll opening	minddle	31.33
2019	P1	2	boll opening	minddle	31.19	31.26	0.0989949
2019	P2	1	boll opening	minddle	31.47
2019	P2	2	boll opening	minddle	29.97	30.72	1.06066
2019	P3	1	boll opening	minddle	31.06
2019	P3	2	boll opening	minddle	30.8	30.93	0.183848
2019	P4	1	boll opening	minddle	30.06
2019	P4	2	boll opening	minddle	29.8	29.93	0.183848
2019	P5	1	boll opening	minddle	29.32
2019	P5	2	boll opening	minddle	30.12	29.72	0.565685
2019	P6	1	boll opening	minddle	29.17
2019	P6	2	boll opening	minddle	29.35	29.26	0.127279
2019	P1	1	boll opening	lower	29.96
2019	P1	2	boll opening	lower	29.78	29.87	0.127279
2019	P2	1	boll opening	lower	29.06
2019	P2	2	boll opening	lower	29.8	29.43	0.523259
2019	P3	1	boll opening	lower	28.89
2019	P3	2	boll opening	lower	28.45	28.67	0.311127
2019	P4	1	boll opening	lower	28.15
2019	P4	2	boll opening	lower	27.77	27.96	0.268701
2019	P5	1	boll opening	lower	28.19
2019	P5	2	boll opening	lower	27.89	28.04	0.212132
2019	P6	1	boll opening	lower	28.06
2019	P6	2	boll opening	lower	27.98	28.02	0.0565685
2020	CK	1	full squaring	/	26.41
2020	CK	2	full squaring	/	26.67	26.54	0.183848
2020	P1	1	full squaring	upper	35.65
2020	P1	2	full squaring	upper	35.49	35.57	0.113137
2020	P2	1	full squaring	upper	34.19
2020	P2	2	full squaring	upper	34.81	34.5	0.438406
2020	P3	1	full squaring	upper	33.55
2020	P3	2	full squaring	upper	33.45	33.5	0.0707107
2020	P4	1	full squaring	upper	32.76
2020	P4	2	full squaring	upper	32.9	32.83	0.0989949
2020	P5	1	full squaring	upper	32.21
2020	P5	2	full squaring	upper	32.65	32.43	0.311127
2020	P6	1	full squaring	upper	31.5
2020	P6	2	full squaring	upper	32.24	31.87	0.523259
2020	P1	1	full squaring	minddle	31.23
2020	P1	2	full squaring	minddle	31.85	31.54	0.438406
2020	P2	1	full squaring	minddle	31.01
2020	P2	2	full squaring	minddle	30.91	30.96	0.0707107
2020	P3	1	full squaring	minddle	31.25
2020	P3	2	full squaring	minddle	30.75	31	0.353553
2020	P4	1	full squaring	minddle	30.77
2020	P4	2	full squaring	minddle	30.45	30.61	0.226274
2020	P5	1	full squaring	minddle	30.18
2020	P5	2	full squaring	minddle	29.86	30.02	0.226274
2020	P6	1	full squaring	minddle	29.77
2020	P6	2	full squaring	minddle	29.45	29.61	0.226274
2020	P1	1	full squaring	lower	30.37
2020	P1	2	full squaring	lower	30.11	30.24	0.183848
2020	P2	1	full squaring	lower	29.87
2020	P2	2	full squaring	lower	29.61	29.74	0.183848
2020	P3	1	full squaring	lower	28.81
2020	P3	2	full squaring	lower	29.23	29.02	0.296985
2020	P4	1	full squaring	lower	29.69
2020	P4	2	full squaring	lower	29.31	29.5	0.268701
2020	P5	1	full squaring	lower	28.3
2020	P5	2	full squaring	lower	28.44	28.37	0.0989949
2020	P6	1	full squaring	lower	28.31
2020	P6	2	full squaring	lower	28.21	28.26	0.0707107
2020	CK	1	full blooming	/	29.3
2020	CK	2	full blooming	/	29.56	29.43	0.183848
2020	P1	1	full blooming	upper	35.57
2020	P1	2	full blooming	upper	35.99	35.78	0.296985
2020	P2	1	full blooming	upper	34.8
2020	P2	2	full blooming	upper	34.98	34.89	0.127279
2020	P3	1	full blooming	upper	34.14
2020	P3	2	full blooming	upper	34	34.07	0.0989949
2020	P4	1	full blooming	upper	33.05
2020	P4	2	full blooming	upper	33.65	33.35	0.424264
2020	P5	1	full blooming	upper	32.84
2020	P5	2	full blooming	upper	32.72	32.78	0.0848528
2020	P6	1	full blooming	upper	31.32
2020	P6	2	full blooming	upper	32.02	31.67	0.494975
2020	P1	1	full blooming	minddle	32.4
2020	P1	2	full blooming	minddle	32.52	32.46	0.0848528
2020	P2	1	full blooming	minddle	31.3
2020	P2	2	full blooming	minddle	31	31.15	0.212132
2020	P3	1	full blooming	minddle	31.65
2020	P3	2	full blooming	minddle	31.49	31.57	0.113137
2020	P4	1	full blooming	minddle	31.35
2020	P4	2	full blooming	minddle	31.21	31.28	0.0989949
2020	P5	1	full blooming	minddle	30.59
2020	P5	2	full blooming	minddle	30.45	30.52	0.0989949
2020	P6	1	full blooming	minddle	29.65
2020	P6	2	full blooming	minddle	30.09	29.87	0.311127
2020	P1	1	full blooming	lower	30.51
2020	P1	2	full blooming	lower	31.01	30.76	0.353553
2020	P2	1	full blooming	lower	30.13
2020	P2	2	full blooming	lower	29.65	29.89	0.339411
2020	P3	1	full blooming	lower	29.52
2020	P3	2	full blooming	lower	29.78	29.65	0.183848
2020	P4	1	full blooming	lower	29.77
2020	P4	2	full blooming	lower	28.93	29.35	0.59397
2020	P5	1	full blooming	lower	29.52
2020	P5	2	full blooming	lower	28.78	29.15	0.523259
2020	P6	1	full blooming	lower	28.59
2020	P6	2	full blooming	lower	29.01	28.8	0.296985
2020	CK	1	full bolling	/	31.36
2020	CK	2	full bolling	/	32.02	31.69	0.46669
2020	P1	1	full bolling	upper	36.93
2020	P1	2	full bolling	upper	37.15	37.04	0.155563
2020	P2	1	full bolling	upper	36.55
2020	P2	2	full bolling	upper	36.23	36.39	0.226274
2020	P3	1	full bolling	upper	35.04
2020	P3	2	full bolling	upper	34.56	34.8	0.339411
2020	P4	1	full bolling	upper	35.56
2020	P4	2	full bolling	upper	35.48	35.52	0.0565685
2020	P5	1	full bolling	upper	33.47
2020	P5	2	full bolling	upper	33.01	33.24	0.325269
2020	P6	1	full bolling	upper	33.38
2020	P6	2	full bolling	upper	32.14	32.76	0.876812
2020	P1	1	full bolling	minddle	33.7
2020	P1	2	full bolling	minddle	33.52	33.61	0.127279
2020	P2	1	full bolling	minddle	33.09
2020	P2	2	full bolling	minddle	32.65	32.87	0.311127
2020	P3	1	full bolling	minddle	33.02
2020	P3	2	full bolling	minddle	31.98	32.5	0.735391
2020	P4	1	full bolling	minddle	32.25
2020	P4	2	full bolling	minddle	31.85	32.05	0.282843
2020	P5	1	full bolling	minddle	31.98
2020	P5	2	full bolling	minddle	31.42	31.7	0.39598
2020	P6	1	full bolling	minddle	31.24
2020	P6	2	full bolling	minddle	31.02	31.13	0.155563
2020	P1	1	full bolling	lower	33.36
2020	P1	2	full bolling	lower	32.98	33.17	0.268701
2020	P2	1	full bolling	lower	32.2
2020	P2	2	full bolling	lower	32.36	32.28	0.113137
2020	P3	1	full bolling	lower	31.22
2020	P3	2	full bolling	lower	32	31.61	0.551543
2020	P4	1	full bolling	lower	30.82
2020	P4	2	full bolling	lower	30.58	30.7	0.169706
2020	P5	1	full bolling	lower	29.8
2020	P5	2	full bolling	lower	29.86	29.83	0.0424264
2020	P6	1	full bolling	lower	29.53
2020	P6	2	full bolling	lower	28.95	29.24	0.410122
2020	CK	1	boll opening	/	24.12
2020	CK	2	boll opening	/	23.98	24.05	0.0989949
2020	P1	1	boll opening	upper	30.69
2020	P1	2	boll opening	upper	30.57	30.63	0.0848528
2020	P2	1	boll opening	upper	29.57
2020	P2	2	boll opening	upper	29.39	29.48	0.127279
2020	P3	1	boll opening	upper	28.23
2020	P3	2	boll opening	upper	27.95	28.09	0.19799
2020	P4	1	boll opening	upper	26.96
2020	P4	2	boll opening	upper	27.14	27.05	0.127279
2020	P5	1	boll opening	upper	27.28
2020	P5	2	boll opening	upper	26.86	27.07	0.296985
2020	P6	1	boll opening	upper	26.57
2020	P6	2	boll opening	upper	26.39	26.48	0.127279
2020	P1	1	boll opening	minddle	28.55
2020	P1	2	boll opening	minddle	28.37	28.46	0.127279
2020	P2	1	boll opening	minddle	28.07
2020	P2	2	boll opening	minddle	27.89	27.98	0.127279
2020	P3	1	boll opening	minddle	27.51
2020	P3	2	boll opening	minddle	27.15	27.33	0.254558
2020	P4	1	boll opening	minddle	27.04
2020	P4	2	boll opening	minddle	27	27.02	0.0282843
2020	P5	1	boll opening	minddle	26.95
2020	P5	2	boll opening	minddle	26.91	26.93	0.0282843
2020	P6	1	boll opening	minddle	26.28
2020	P6	2	boll opening	minddle	26.5	26.39	0.155563
2020	P1	1	boll opening	lower	28.15
2020	P1	2	boll opening	lower	27.81	27.98	0.240416
2020	P2	1	boll opening	lower	27.06
2020	P2	2	boll opening	lower	27.8	27.43	0.523259
2020	P3	1	boll opening	lower	26.6
2020	P3	2	boll opening	lower	26.7	26.65	0.0707107
2020	P4	1	boll opening	lower	26.7
2020	P4	2	boll opening	lower	26.3	26.5	0.282843
2020	P5	1	boll opening	lower	26.9
2020	P5	2	boll opening	lower	26.36	26.63	0.381838
2020	P6	1	boll opening	lower	25.8
2020	P6	2	boll opening	lower	26.2	26	0.282843
average of 2019 and 2020
	P1	P2	P3	P4	P5	P6
upper	36.3488	35.4637	34.315	33.6675	32.8612	31.9838
middle	32.1437	31.3588	31.1275	30.6075	30.1388	29.4887
lower	30.8562	30.2087	29.5113	29.12	28.8175	28.2575

## Sheet: Fig.5-Relative humidity (RH)
Year	Treatment	Repetitions	Growth period	Layer	Relative humidity	Average RH	Standard error
2019	CK	1	full squaring	/	41.41
2019	CK	2	full squaring	/	41.25	41.33	0.113137
2019	P1	1	full squaring	upper	32.93
2019	P1	2	full squaring	upper	32.89	32.91	0.0282843
2019	P2	1	full squaring	upper	36.05
2019	P2	2	full squaring	upper	35.91	35.98	0.0989949
2019	P3	1	full squaring	upper	37.93
2019	P3	2	full squaring	upper	37.89	37.91	0.0282843
2019	P4	1	full squaring	upper	39.67
2019	P4	2	full squaring	upper	39.59	39.63	0.0565685
2019	P5	1	full squaring	upper	42.44
2019	P5	2	full squaring	upper	42.26	42.35	0.127279
2019	P6	1	full squaring	upper	45.09
2019	P6	2	full squaring	upper	44.95	45.02	0.0989949
2019	P1	1	full squaring	minddle	44.8
2019	P1	2	full squaring	minddle	44.34	44.57	0.325269
2019	P2	1	full squaring	minddle	47.94
2019	P2	2	full squaring	minddle	47.8	47.87	0.0989949
2019	P3	1	full squaring	minddle	50.49
2019	P3	2	full squaring	minddle	50.29	50.39	0.141421
2019	P4	1	full squaring	minddle	52.34
2019	P4	2	full squaring	minddle	51.96	52.15	0.268701
2019	P5	1	full squaring	minddle	54.28
2019	P5	2	full squaring	minddle	53.12	53.7	0.820244
2019	P6	1	full squaring	minddle	55.27
2019	P6	2	full squaring	minddle	54.99	55.13	0.19799
2019	P1	1	full squaring	lower	47.57
2019	P1	2	full squaring	lower	47.21	47.39	0.254558
2019	P2	1	full squaring	lower	49.58
2019	P2	2	full squaring	lower	48.98	49.28	0.424264
2019	P3	1	full squaring	lower	54.93
2019	P3	2	full squaring	lower	54.89	54.91	0.0282843
2019	P4	1	full squaring	lower	56.53
2019	P4	2	full squaring	lower	56.21	56.37	0.226274
2019	P5	1	full squaring	lower	57.67
2019	P5	2	full squaring	lower	57.15	57.41	0.367696
2019	P6	1	full squaring	lower	59.82
2019	P6	2	full squaring	lower	59.44	59.63	0.268701
2019	CK	1	full blooming	/	42.62
2019	CK	2	full blooming	/	42.34	42.48	0.19799
2019	P1	1	full blooming	upper	37.17
2019	P1	2	full blooming	upper	37.69	37.43	0.367696
2019	P2	1	full blooming	upper	39.46
2019	P2	2	full blooming	upper	38.98	39.22	0.339411
2019	P3	1	full blooming	upper	41.49
2019	P3	2	full blooming	upper	41.21	41.35	0.19799
2019	P4	1	full blooming	upper	43.67
2019	P4	2	full blooming	upper	43.89	43.78	0.155563
2019	P5	1	full blooming	upper	47.84
2019	P5	2	full blooming	upper	47.76	47.8	0.0565685
2019	P6	1	full blooming	upper	48.77
2019	P6	1	full blooming	upper	49.05	48.91	0.19799
2019	P1	1	full blooming	minddle	51.35
2019	P1	2	full blooming	minddle	51.09	51.22	0.183848
2019	P2	1	full blooming	minddle	54.45
2019	P2	2	full blooming	minddle	53.99	54.22	0.325269
2019	P3	1	full blooming	minddle	56.18
2019	P3	2	full blooming	minddle	56	56.09	0.127279
2019	P4	1	full blooming	minddle	58.39
2019	P4	2	full blooming	minddle	58.01	58.2	0.268701
2019	P5	1	full blooming	minddle	59.46
2019	P5	2	full blooming	minddle	59.58	59.52	0.0848528
2019	P6	1	full blooming	minddle	61.52
2019	P6	2	full blooming	minddle	61.82	61.67	0.212132
2019	P1	1	full blooming	lower	54.59
2019	P1	2	full blooming	lower	54.89	54.74	0.212132
2019	P2	1	full blooming	lower	57.52
2019	P2	2	full blooming	lower	57.78	57.65	0.183848
2019	P3	1	full blooming	lower	61.55
2019	P3	2	full blooming	lower	61.59	61.57	0.0282843
2019	P4	1	full blooming	lower	62.26
2019	P4	2	full blooming	lower	62.78	62.52	0.367696
2019	P5	1	full blooming	lower	64.13
2019	P5	2	full blooming	lower	64.21	64.17	0.0565685
2019	P6	1	full blooming	lower	67.31
2019	P6	2	full blooming	lower	66.95	67.13	0.254558
2019	CK	1	full bolling	/	45.73
2019	CK	2	full bolling	/	45.69	45.71	0.0282843
2019	P1	1	full bolling	upper	44.96
2019	P1	2	full bolling	upper	44.9	44.93	0.0424264
2019	P2	1	full bolling	upper	48.37
2019	P2	2	full bolling	upper	47.97	48.17	0.282843
2019	P3	1	full bolling	upper	50.41
2019	P3	2	full bolling	upper	50.33	50.37	0.0565685
2019	P4	1	full bolling	upper	53.31
2019	P4	2	full bolling	upper	53.21	53.26	0.0707107
2019	P5	1	full bolling	upper	55.15
2019	P5	2	full bolling	upper	55.67	55.41	0.367696
2019	P6	1	full bolling	upper	57.71
2019	P6	2	full bolling	upper	57.89	57.8	0.127279
2019	P1	1	full bolling	minddle	58.95
2019	P1	2	full bolling	minddle	58.97	58.96	0.0141421
2019	P2	1	full bolling	minddle	61.73
2019	P2	2	full bolling	minddle	61.79	61.76	0.0424264
2019	P3	1	full bolling	minddle	63.24
2019	P3	2	full bolling	minddle	62.98	63.11	0.183848
2019	P4	1	full bolling	minddle	64.62
2019	P4	2	full bolling	minddle	64.56	64.59	0.0424264
2019	P5	1	full bolling	minddle	66.71
2019	P5	2	full bolling	minddle	66.37	66.54	0.240416
2019	P6	1	full bolling	minddle	68.51
2019	P6	2	full bolling	minddle	68.19	68.35	0.226274
2019	P1	1	full bolling	lower	68.21
2019	P1	2	full bolling	lower	67.39	67.8	0.579828
2019	P2	1	full bolling	lower	68.78
2019	P2	2	full bolling	lower	68.66	68.72	0.0848528
2019	P3	1	full bolling	lower	69.8
2019	P3	2	full bolling	lower	69.54	69.67	0.183848
2019	P4	1	full bolling	lower	71.39
2019	P4	2	full bolling	lower	71.01	71.2	0.268701
2019	P5	1	full bolling	lower	72.4
2019	P5	2	full bolling	lower	72.3	72.35	0.0707107
2019	P6	1	full bolling	lower	73.76
2019	P6	2	full bolling	lower	73.58	73.67	0.127279
2019	CK	1	boll opening	/	35.79
2019	CK	2	boll opening	/	35.21	35.5	0.410122
2019	P1	1	boll opening	upper	29.3
2019	P1	2	boll opening	upper	29	29.15	0.212132
2019	P2	1	boll opening	upper	31.89
2019	P2	2	boll opening	upper	31.59	31.74	0.212132
2019	P3	1	boll opening	upper	32.04
2019	P3	2	boll opening	upper	32	32.02	0.0282843
2019	P4	1	boll opening	upper	34.58
2019	P4	2	boll opening	upper	34.6	34.59	0.0141421
2019	P5	1	boll opening	upper	41.64
2019	P5	2	boll opening	upper	41.5	41.57	0.0989949
2019	P6	1	boll opening	upper	36
2019	P6	2	boll opening	upper	35.96	35.98	0.0282843
2019	P1	1	boll opening	minddle	34.67
2019	P1	2	boll opening	minddle	34.89	34.78	0.155563
2019	P2	1	boll opening	minddle	38.16
2019	P2	2	boll opening	minddle	37.98	38.07	0.127279
2019	P3	1	boll opening	minddle	41.07
2019	P3	2	boll opening	minddle	40.49	40.78	0.410122
2019	P4	1	boll opening	minddle	41.35
2019	P4	2	boll opening	minddle	41.21	41.28	0.0989949
2019	P5	1	boll opening	minddle	45.71
2019	P5	2	boll opening	minddle	45.29	45.5	0.296985
2019	P6	1	boll opening	minddle	44.55
2019	P6	2	boll opening	minddle	44.49	44.52	0.0424264
2019	P1	1	boll opening	lower	39.89
2019	P1	2	boll opening	lower	39.71	39.8	0.127279
2019	P2	1	boll opening	lower	40.72
2019	P2	2	boll opening	lower	40.94	40.83	0.155563
2019	P3	1	boll opening	lower	43.36
2019	P3	2	boll opening	lower	42.98	43.17	0.268701
2019	P4	1	boll opening	lower	48.93
2019	P4	2	boll opening	lower	48.67	48.8	0.183848
2019	P5	1	boll opening	lower	46.63
2019	P5	2	boll opening	lower	46.93	46.78	0.212132
2019	P6	1	boll opening	lower	43.53
2019	P6	2	boll opening	lower	43.39	43.46	0.0989949
2020	CK	1	full squaring	/	43.57
2020	CK	2	full squaring	/	43.37	43.47	0.141421
2020	P1	1	full squaring	upper	35.94
2020	P1	2	full squaring	upper	35.98	35.96	0.0282843
2020	P2	1	full squaring	upper	39.37
2020	P2	2	full squaring	upper	38.97	39.17	0.282843
2020	P3	1	full squaring	upper	41.78
2020	P3	2	full squaring	upper	41.56	41.67	0.155563
2020	P4	1	full squaring	upper	43.2
2020	P4	2	full squaring	upper	43.58	43.39	0.268701
2020	P5	1	full squaring	upper	45.02
2020	P5	2	full squaring	upper	44.9	44.96	0.0848528
2020	P6	1	full squaring	upper	46.71
2020	P6	2	full squaring	upper	46.59	46.65	0.0848528
2020	P1	1	full squaring	minddle	43.42
2020	P1	2	full squaring	minddle	42.98	43.2	0.311127
2020	P2	1	full squaring	minddle	45.28
2020	P2	2	full squaring	minddle	45.06	45.17	0.155563
2020	P3	1	full squaring	minddle	47.27
2020	P3	2	full squaring	minddle	47.39	47.33	0.0848528
2020	P4	1	full squaring	minddle	49.61
2020	P4	2	full squaring	minddle	49.87	49.74	0.183848
2020	P5	1	full squaring	minddle	52.15
2020	P5	2	full squaring	minddle	51.45	51.8	0.494975
2020	P6	1	full squaring	minddle	53.77
2020	P6	2	full squaring	minddle	54.09	53.93	0.226274
2020	P1	1	full squaring	lower	47.12
2020	P1	2	full squaring	lower	47.54	47.33	0.296985
2020	P2	1	full squaring	lower	49.65
2020	P2	2	full squaring	lower	49.31	49.48	0.240416
2020	P3	1	full squaring	lower	52.61
2020	P3	2	full squaring	lower	52.43	52.52	0.127279
2020	P4	1	full squaring	lower	55.07
2020	P4	2	full squaring	lower	54.89	54.98	0.127279
2020	P5	1	full squaring	lower	56.58
2020	P5	2	full squaring	lower	56.98	56.78	0.282843
2020	P6	1	full squaring	lower	58.39
2020	P6	2	full squaring	lower	58.75	58.57	0.254558
2020	CK	1	full blooming	/	43.66
2020	CK	2	full blooming	/	43.98	43.82	0.226274
2020	P1	1	full blooming	upper	37.52
2020	P1	2	full blooming	upper	37.78	37.65	0.183848
2020	P2	1	full blooming	upper	41.53
2020	P2	2	full blooming	upper	41.65	41.59	0.0848528
2020	P3	1	full blooming	upper	44.29
2020	P3	2	full blooming	upper	44.31	44.3	0.0141421
2020	P4	1	full blooming	upper	46.35
2020	P4	2	full blooming	upper	45.99	46.17	0.254558
2020	P5	1	full blooming	upper	48.05
2020	P5	2	full blooming	upper	47.95	48	0.0707107
2020	P6	1	full blooming	upper	50.59
2020	P6	2	full blooming	upper	50.49	50.54	0.0707107
2020	P1	1	full blooming	minddle	46.44
2020	P1	2	full blooming	minddle	46.78	46.61	0.240416
2020	P2	1	full blooming	minddle	49.52
2020	P2	2	full blooming	minddle	49.34	49.43	0.127279
2020	P3	1	full blooming	minddle	51.97
2020	P3	2	full blooming	minddle	51.99	51.98	0.0141421
2020	P4	1	full blooming	minddle	52.97
2020	P4	2	full blooming	minddle	53.29	53.13	0.226274
2020	P5	1	full blooming	minddle	55.05
2020	P5	2	full blooming	minddle	54.69	54.87	0.254558
2020	P6	1	full blooming	minddle	56.36
2020	P6	2	full blooming	minddle	56.08	56.22	0.19799
2020	P1	1	full blooming	lower	49.07
2020	P1	2	full blooming	lower	49.15	49.11	0.0565685
2020	P2	1	full blooming	lower	51.65
2020	P2	2	full blooming	lower	51.87	51.76	0.155563
2020	P3	1	full blooming	lower	54.94
2020	P3	2	full blooming	lower	54.98	54.96	0.0282843
2020	P4	1	full blooming	lower	56.81
2020	P4	2	full blooming	lower	56.79	56.8	0.0141421
2020	P5	1	full blooming	lower	57.15
2020	P5	2	full blooming	lower	55.67	56.41	1.04652
2020	P6	1	full blooming	lower	60.55
2020	P6	2	full blooming	lower	60.75	60.65	0.141421
2020	CK	1	full bolling	/	45.79
2020	CK	2	full bolling	/	45.61	45.7	0.127279
2020	P1	1	full bolling	upper	44.77
2020	P1	2	full bolling	upper	44.89	44.83	0.0848528
2020	P2	1	full bolling	upper	48.68
2020	P2	2	full bolling	upper	48.98	48.83	0.212132
2020	P3	1	full bolling	upper	52.9
2020	P3	2	full bolling	upper	52.96	52.93	0.0424264
2020	P4	1	full bolling	upper	52.17
2020	P4	2	full bolling	upper	52.13	52.15	0.0282843
2020	P5	1	full bolling	upper	58.35
2020	P5	2	full bolling	upper	58.09	58.22	0.183848
2020	P6	1	full bolling	upper	60.08
2020	P6	2	full bolling	upper	60	60.04	0.0565685
2020	P1	1	full bolling	minddle	57.32
2020	P1	2	full bolling	minddle	57.68	57.5	0.254558
2020	P2	1	full bolling	minddle	63.81
2020	P2	2	full bolling	minddle	63.59	63.7	0.155563
2020	P3	1	full bolling	minddle	64.24
2020	P3	2	full bolling	minddle	63.98	64.11	0.183848
2020	P4	1	full bolling	minddle	64.75
2020	P4	2	full bolling	minddle	64.39	64.57	0.254558
2020	P5	1	full bolling	minddle	67.64
2020	P5	2	full bolling	minddle	67.62	67.63	0.0141421
2020	P6	1	full bolling	minddle	70.7
2020	P6	2	full bolling	minddle	70.6	70.65	0.0707107
2020	P1	1	full bolling	lower	68.56
2020	P1	2	full bolling	lower	68.44	68.5	0.0848528
2020	P2	1	full bolling	lower	68.63
2020	P2	2	full bolling	lower	68.59	68.61	0.0282843
2020	P3	1	full bolling	lower	70.27
2020	P3	2	full bolling	lower	70.17	70.22	0.0707107
2020	P4	1	full bolling	lower	73.01
2020	P4	2	full bolling	lower	72.91	72.96	0.0707107
2020	P5	1	full bolling	lower	72.95
2020	P5	2	full bolling	lower	72.87	72.91	0.0565685
2020	P6	1	full bolling	lower	77.88
2020	P6	2	full bolling	lower	77.78	77.83	0.0707107
2020	CK	1	boll opening	/	36.79
2020	CK	2	boll opening	/	36.69	36.74	0.0707107
2020	P1	1	boll opening	upper	28.51
2020	P1	2	boll opening	upper	28.93	28.72	0.296985
2020	P2	1	boll opening	upper	31.65
2020	P2	2	boll opening	upper	31.71	31.68	0.0424264
2020	P3	1	boll opening	upper	36.74
2020	P3	2	boll opening	upper	36.7	36.72	0.0282843
2020	P4	1	boll opening	upper	37.45
2020	P4	2	boll opening	upper	37.39	37.42	0.0424264
2020	P5	1	boll opening	upper	38.81
2020	P5	2	boll opening	upper	38.65	38.73	0.113137
2020	P6	1	boll opening	upper	38.28
2020	P6	2	boll opening	upper	37.98	38.13	0.212132
2020	P1	1	boll opening	minddle	36.14
2020	P1	2	boll opening	minddle	36	36.07	0.0989949
2020	P2	1	boll opening	minddle	37.7
2020	P2	2	boll opening	minddle	38.12	37.91	0.296985
2020	P3	1	boll opening	minddle	38.68
2020	P3	2	boll opening	minddle	38.54	38.61	0.0989949
2020	P4	1	boll opening	minddle	39.07
2020	P4	2	boll opening	minddle	38.65	38.86	0.296985
2020	P5	1	boll opening	minddle	42.67
2020	P5	2	boll opening	minddle	42.59	42.63	0.0565685
2020	P6	1	boll opening	minddle	40.13
2020	P6	2	boll opening	minddle	40.21	40.17	0.0565685
2020	P1	1	boll opening	lower	39.48
2020	P1	2	boll opening	lower	39.12	39.3	0.254558
2020	P2	1	boll opening	lower	40.07
2020	P2	2	boll opening	lower	39.89	39.98	0.127279
2020	P3	1	boll opening	lower	40.08
2020	P3	2	boll opening	lower	40.1	40.09	0.0141421
2020	P4	1	boll opening	lower	41.01
2020	P4	2	boll opening	lower	40.95	40.98	0.0424264
2020	P5	1	boll opening	lower	46.41
2020	P5	2	boll opening	lower	46.19	46.3	0.155563
2020	P6	1	boll opening	lower	44.04
2020	P6	2	boll opening	lower	44	44.02	0.0282843
average of 2019 and 2020
	P1	P2	P3	P4	P5	P6
upper	39.5475	42.1587	43.7987	47.13	47.8837	31.9838
middle	49.7662	51.55	52.815	55.2737	56.33	29.4887
lower	53.2888	55.8888	58.0763	59.3888	60.62	28.2575

## Sheet: Fig.6-fit curve
Treatment	Plant density (plsnt/m2)	Layer	Facotr	2-year average value
P1	9	upper	LI	24.8315	*100%
P2	12	upper	LI	26.5404
P3	15	upper	LI	26.9885
P4	18	upper	LI	28.3777
P5	21	upper	LI	28.2212
P6	24	upper	LI	25.8165
P1	9	middle	LI	47.4655
P2	12	middle	LI	56.6518
P3	15	middle	LI	54.6683
P4	18	middle	LI	57.7441
P5	21	middle	LI	58.8466
P6	24	middle	LI	59.6045
P1	9	lower	LI	64.2775
P2	12	lower	LI	70.5429
P3	15	lower	LI	79.5161
P4	18	lower	LI	79.4167
P5	21	lower	LI	80.4453
P6	24	lower	LI	82.4624
P1	9	upper	T	36.3488	℃
P2	12	upper	T	35.4637
P3	15	upper	T	34.315
P4	18	upper	T	33.6675
P5	21	upper	T	32.8612
P6	24	upper	T	31.9838
P1	9	middle	T	32.1437
P2	12	middle	T	31.3588
P3	15	middle	T	31.1275
P4	18	middle	T	30.6075
P5	21	middle	T	30.1388
P6	24	middle	T	29.4887
P1	9	lower	T	30.8562
P2	12	lower	T	30.2087
P3	15	lower	T	29.5113
P4	18	lower	T	29.12
P5	21	lower	T	28.8175
P6	24	lower	T	28.2575
P1	9	upper	RH	39.5475	%
P2	12	upper	RH	42.1587
P3	15	upper	RH	43.7987
P4	18	upper	RH	47.13
P5	21	upper	RH	47.8837
P6	24	upper	RH	41.8438
P1	9	middle	RH	49.7662
P2	12	middle	RH	51.55
P3	15	middle	RH	52.815
P4	18	middle	RH	55.2737
P5	21	middle	RH	56.33
P6	24	middle	RH	41.8438
P1	9	lower	RH	53.2888
P2	12	lower	RH	55.8888
P3	15	lower	RH	58.0763
P4	18	lower	RH	59.3888
P5	21	lower	RH	60.62
P6	24	lower	RH	41.8438

## Sheet: Tab1 
District station number	Year	Month	Precipitation from 20-20 hours (mm)	Average temperature(℃)
51730	2019	4	4.7	19
51730	2019	5	16.7	19.8
51730	2019	6	28.7	22.6
51730	2019	7	3.2	26.8
51730	2019	8	13.6	24.9
51730	2019	9	26.1	19.5
51730	2019	10	0	12.2
51730	2020	4	0.2	17.07
51730	2020	5	0	20.78
51730	2020	6	7.4	22.8
51730	2020	7	13.2	23.3
51730	2020	8	4.8	23.6
51730	2020	9	1.6	19.1

## Sheet: Tab2
Year	Repetitions	Total nitrogen	Organic matter	Available nitrogen	Available phosphorous	Available potassium
		(g/kg)	(g/kg)	(mg/kg)	(mg/kg)	(mg/kg)
2019	1	0.37	10.19	22.05	32.22	72.41
2019	2	0.41	9.83	20.6	31.78	71.97
2019	3	0.42	9.92	20.35	32.03	71.62
2020	1	0.46	9.97	52.03	37.22	94.28
2020	2	0.47	10.15	50.96	36.78	93.67
2020	3	0.51	9.94	51.21	36.1	94.05

## Sheet: Tab.3-Boll number and weight
Year	Treatment	Repetitions	Fruir positions	Boll number /plant	Boll number /m2	Boll weight /g
2019	P1	1	FB>7	5.6	50.4	5.723
2019	P1	2	FB>7	5.5	49.5	6.882
2019	P1	3	FB>7	5.1	45.9	6.885
2019	P2	1	FB>7	3.7	44.4	6.28
2019	P2	2	FB>7	3.9	46.8	6.5
2019	P2	3	FB>7	3.6	43.2	7.01
2019	P3	1	FB>7	3	45	6.529
2019	P3	2	FB>7	2.4	36	6.529
2019	P3	3	FB>7	2.7	40.5	6.846
2019	P4	1	FB>7	3	54	7.36
2019	P4	2	FB>7	3	54	6.459
2019	P4	3	FB>7	2.7	48.6	6.727
2019	P5	1	FB>7	1.3	27.3	5.92
2019	P5	2	FB>7	1.3	27.3	6.56
2019	P5	3	FB>7	1.1	23.1	7.18
2019	P6	1	FB>7	1.4	33.6	6.122
2019	P6	2	FB>7	1.2	28.8	6.07
2019	P6	3	FB>7	1.2	28.8	6.009
2019	P1	1	FB4-6	3.9	35.1	6.9375
2019	P1	2	FB4-6	4.1	36.9	7.0305
2019	P1	3	FB4-6	4.2	37.8	7.04
2019	P2	1	FB4-6	4.4	52.8	7.025
2019	P2	2	FB4-6	4.8	57.6	7.121
2019	P2	3	FB4-6	4.8	57.6	7.02
2019	P3	1	FB4-6	3.7	55.5	6.903
2019	P3	2	FB4-6	3.4	51	7.238
2019	P3	3	FB4-6	3.4	51	/
2019	P4	1	FB4-6	3.6	64.8	7.439
2019	P4	2	FB4-6	3.3	59.4	7.083
2019	P4	3	FB4-6	3.6	64.8	6.989
2019	P5	1	FB4-6	2.5	52.5	6.961
2019	P5	2	FB4-6	2.9	60.9	7.123
2019	P5	3	FB4-6	2.2	46.2	/
2019	P6	1	FB4-6	2.2	52.8	7.02
2019	P6	2	FB4-6	2.6	62.4	6.961
2019	P6	3	FB4-6	2.4	57.6	6.89
2019	P1	1	FB1-3	4.6	41.4	5.976
2019	P1	2	FB1-3	5.3	47.7	6.045
2019	P1	3	FB1-3	5.2	46.8	6.365
2019	P2	1	FB1-3	4.7	56.4	6.42
2019	P2	2	FB1-3	5.4	64.8	6.32
2019	P2	3	FB1-3	4.7	56.4	6.267
2019	P3	1	FB1-3	4.1	61.5	6.536
2019	P3	2	FB1-3	4.1	61.5	7.032
2019	P3	3	FB1-3	3.7	55.5	7.03
2019	P4	1	FB1-3	3	54	6.812
2019	P4	2	FB1-3	3.6	64.8	/
2019	P4	3	FB1-3	3.1	55.8	6.465
2019	P5	1	FB1-3	3.1	65.1	6.021
2019	P5	2	FB1-3	3.3	69.3	6.153
2019	P5	3	FB1-3	3.1	65.1	6.029
2019	P6	1	FB1-3	2.7	64.8	6.3
2019	P6	2	FB1-3	2.3	55.2	6.181
2019	P6	3	FB1-3	2.6	62.4	5.99
2020	P1	1	FB>7	5	45	/
2020	P1	2	FB>7	5	45	6.259
2020	P1	3	FB>7	4.7	42.3	6.391
2020	P2	1	FB>7	5	60	6.534
2020	P2	2	FB>7	4.8	57.6	6.032
2020	P2	3	FB>7	4.7	56.4	6.922
2020	P3	1	FB>7	3.9	58.5	/
2020	P3	2	FB>7	4	60	6.493
2020	P3	3	FB>7	3.7	55.5	6.898
2020	P4	1	FB>7	2.2	39.6	6.395
2020	P4	2	FB>7	2.9	52.2	6.338
2020	P4	3	FB>7	2.6	46.8	6.846
2020	P5	1	FB>7	2	42	6.251
2020	P5	2	FB>7	1.6	33.6	5.913
2020	P5	3	FB>7	1.8	37.8	5.941
2020	P6	1	FB>7	0.7	16.8	5.919
2020	P6	2	FB>7	0.5	12	5.279
2020	P6	3	FB>7	0.6	14.4	5.423
2020	P1	1	FB4-6	5	45	7.015
2020	P1	2	FB4-6	5.3	47.7	6.746
2020	P1	3	FB4-6	5.4	48.6	7.014
2020	P2	1	FB4-6	4.5	54	7.071
2020	P2	2	FB4-6	4.9	58.8	/
2020	P2	3	FB4-6	4.1	49.2	7.056
2020	P3	1	FB4-6	3.1	46.5	7.388
2020	P3	2	FB4-6	4	60	7.281
2020	P3	3	FB4-6	4.1	61.5	7.177
2020	P4	1	FB4-6	3.5	63	6.859
2020	P4	2	FB4-6	3.8	68.4	7.498
2020	P4	3	FB4-6	3.5	63	7.329
2020	P5	1	FB4-6	2.9	60.9	6.582
2020	P5	2	FB4-6	2.9	60.9	6.942
2020	P5	3	FB4-6	3.2	67.2	6.677
2020	P6	1	FB4-6	2.6	62.4	6.736
2020	P6	2	FB4-6	2.3	55.2	/
2020	P6	3	FB4-6	2.5	60	6.539
2020	P1	1	FB1-3	5.1	45.9	6.022
2020	P1	2	FB1-3	5	45	5.994
2020	P1	3	FB1-3	5.4	48.6	6.181
2020	P2	1	FB1-3	5	60	6.587
2020	P2	2	FB1-3	4.9	58.8	6.368
2020	P2	3	FB1-3	4.9	58.8	/
2020	P3	1	FB1-3	4.8	72	7.057
2020	P3	2	FB1-3	5.3	79.5	7.072
2020	P3	3	FB1-3	5	75	6.697
2020	P4	1	FB1-3	4.6	82.8	6.682
2020	P4	2	FB1-3	4.4	79.2	6.704
2020	P4	3	FB1-3	4.2	75.6	6.505
2020	P5	1	FB1-3	3.8	79.8	6.144
2020	P5	2	FB1-3	3.6	75.6	6.011
2020	P5	3	FB1-3	4	84	6.336
2020	P6	1	FB1-3	3.1	74.4	6.359
2020	P6	2	FB1-3	3.4	81.6	/
2020	P6	3	FB1-3	3.3	79.2	6.312
Note: “/ ” Represents the outliers removed.

## Sheet: Tab3- boll setting ratio
Year	Treatment	Repetitions	Fruir positions	Setting bolls	Retained and shed bolls	Total bolls	BSR/%		average setting bolls	average total bolls	BSR/%
2019	P1	1	FB>7	56	97	153	36.6013
2019	P1	2	FB>7	55	93	148	37.1622
2019	P1	3	FB>7	51	90	141	36.1702		54	93.3333	36.6516
2019	P2	1	FB>7	37	78	115	32.1739
2019	P2	2	FB>7	39	71	110	35.4545
2019	P2	3	FB>7	36	78	114	31.5789		37.3333	75.6667	33.0383
2019	P3	1	FB>7	30	59	89	33.7079
2019	P3	2	FB>7	24	46	70	34.2857
2019	P3	3	FB>7	27	47	74	36.4865		27	50.6667	34.7639
2019	P4	1	FB>7	30	50	80	37.5
2019	P4	2	FB>7	30	44	74	40.5405
2019	P4	3	FB>7	27	49	76	35.5263		29	47.6667	37.8261
2019	P5	1	FB>7	13	36	49	26.5306
2019	P5	2	FB>7	13	39	52	25
2019	P5	3	FB>7	11	32	43	25.5814		12.3333	35.6667	25.6944
2019	P6	1	FB>7	14	37	51	27.451
2019	P6	2	FB>7	12	34	46	26.087
2019	P6	3	FB>7	12	37	49	24.4898		12.6667	36	26.0274
2019	P1	1	FB4-6	39	77	116	33.6207
2019	P1	2	FB4-6	41	56	97	42.268
2019	P1	3	FB4-6	42	37	79	53.1646		40.6667	56.6667	41.7808
2019	P2	1	FB4-6	44	43	87	50.5747
2019	P2	2	FB4-6	48	36	84	57.1429
2019	P2	3	FB4-6	48	27	75	64		46.6667	35.3333	56.9106
2019	P3	1	FB4-6	37	33	70	52.8571
2019	P3	2	FB4-6	35	25	60	58.3333
2019	P3	3	FB4-6	34	21	55	61.8182		35.3333	26.3333	57.2973
2019	P4	1	FB4-6	36	25	61	59.0164
2019	P4	2	FB4-6	33	32	65	50.7692
2019	P4	3	FB4-6	36	38	74	48.6486		35	31.6667	52.5
2019	P5	1	FB4-6	25	30	55	45.4545
2019	P5	2	FB4-6	29	29	58	50
2019	P5	3	FB4-6	22	30	52	42.3077		25.3333	29.6667	46.0606
2019	P6	1	FB4-6	22	40	62	35.4839
2019	P6	2	FB4-6	26	27	53	49.0566
2019	P6	3	FB4-6	24	39	63	38.0952		24	35.3333	40.4494
2019	P1	1	FB1-3	46	32	78	58.9744
2019	P1	2	FB1-3	53	33	86	61.6279
2019	P1	3	FB1-3	52	24	76	68.4211		50.3333	29.6667	62.9167
2019	P2	1	FB1-3	47	29	76	61.8421
2019	P2	2	FB1-3	54	30	84	64.2857
2019	P2	3	FB1-3	47	21	68	69.1176		49.3333	26.6667	64.9123
2019	P3	1	FB1-3	41	22	63	65.0794
2019	P3	2	FB1-3	40	20	60	66.6667
2019	P3	3	FB1-3	37	12	49	75.5102		39.3333	18	68.6047
2019	P4	1	FB1-3	30	28	58	51.7241
2019	P4	2	FB1-3	36	15	51	70.5882
2019	P4	3	FB1-3	31	17	48	64.5833		32.3333	20	61.7834
2019	P5	1	FB1-3	31	15	46	67.3913
2019	P5	2	FB1-3	33	11	44	75
2019	P5	3	FB1-3	31	20	51	60.7843		31.6667	15.3333	67.3759
2019	P6	1	FB1-3	27	12	39	69.2308
2019	P6	2	FB1-3	23	13	36	63.8889
2019	P6	3	FB1-3	26	16	42	61.9048		25.3333	13.6667	64.9573
2020	P1	1	FB>7	50	44	94	53.1915
2020	P1	2	FB>7	50	43	93	53.7634
2020	P1	3	FB>7	47	44	91	51.6484		49	43.6667	52.8777
2020	P2	1	FB>7	50	48	98	51.0204
2020	P2	2	FB>7	48	50	98	48.9796
2020	P2	3	FB>7	47	48	95	49.4737		48.3333	48.6667	49.8282
2020	P3	1	FB>7	39	31	70	55.7143
2020	P3	2	FB>7	40	30	70	57.1429
2020	P3	3	FB>7	37	32	69	53.6232		38.6667	31	55.5024
2020	P4	1	FB>7	22	31	53	41.5094
2020	P4	2	FB>7	29	36	65	44.6154
2020	P4	3	FB>7	26	32	58	44.8276		25.6667	33	43.75
2020	P5	1	FB>7	20	40	60	33.3333
2020	P5	2	FB>7	16	38	54	29.6296
2020	P5	3	FB>7	18	36	54	33.3333		18	38	32.1429
2020	P6	1	FB>7	7	27	34	20.5882
2020	P6	2	FB>7	5	26	31	16.129
2020	P6	3	FB>7	6	26	32	18.75		6	26.3333	18.5567
2020	P1	1	FB4-6	50	35	85	58.8235
2020	P1	2	FB4-6	53	37	90	58.8889
2020	P1	3	FB4-6	54	38	92	58.6957		52.3333	36.6667	58.8015
2020	P2	1	FB4-6	45	28	73	61.6438
2020	P2	2	FB4-6	49	32	81	60.4938
2020	P2	3	FB4-6	41	24	65	63.0769		45	28	61.6438
2020	P3	1	FB4-6	31	21	52	59.6154
2020	P3	2	FB4-6	40	23	63	63.4921
2020	P3	3	FB4-6	41	23	64	64.0625		37.3333	22.3333	62.5698
2020	P4	1	FB4-6	35	20	55	63.6364
2020	P4	2	FB4-6	38	22	60	63.3333
2020	P4	3	FB4-6	35	23	58	60.3448		36	21.6667	62.4277
2020	P5	1	FB4-6	29	29	58	50
2020	P5	2	FB4-6	29	30	59	49.1525
2020	P5	3	FB4-6	32	27	59	54.2373		30	28.6667	51.1364
2020	P6	1	FB4-6	26	32	58	44.8276
2020	P6	2	FB4-6	23	35	58	39.6552
2020	P6	3	FB4-6	25	33	58	43.1034		24.6667	33.3333	42.5287
2020	P1	1	FB1-3	51	21	72	70.8333
2020	P1	2	FB1-3	50	22	72	69.4444
2020	P1	3	FB1-3	54	23	77	70.1299		51.6667	22	70.1357
2020	P2	1	FB1-3	50	16	66	75.7576
2020	P2	2	FB1-3	49	12	61	80.3279
2020	P2	3	FB1-3	49	12	61	80.3279		49.3333	13.3333	78.7234
2020	P3	1	FB1-3	48	9	57	84.2105
2020	P3	2	FB1-3	53	10	63	84.127
2020	P3	3	FB1-3	50	9	59	84.7458		50.3333	9.33333	84.3575
2020	P4	1	FB1-3	46	13	59	77.9661
2020	P4	2	FB1-3	44	10	54	81.4815
2020	P4	3	FB1-3	42	10	52	80.7692		44	11	80
2020	P5	1	FB1-3	38	16	54	70.3704
2020	P5	2	FB1-3	36	20	56	64.2857
2020	P5	3	FB1-3	40	15	55	72.7273		38	17	69.0909
2020	P6	1	FB1-3	31	25	56	55.3571
2020	P6	2	FB1-3	34	21	55	61.8182
2020	P6	3	FB1-3	33	24	57	57.8947		32.6667	23.3333	58.3333

## Sheet: Tab.4 data
Treatment	Plant density (plants/m2)	Layer	LI	T	RH
P1	9	upper	24.8315	36.3503	36.4493
P2	12	upper	26.5404	35.4646	39.5473
P3	15	upper	26.9885	34.3157	42.1591
P4	18	upper	28.3777	33.6671	43.7989
P5	21	upper	28.2212	32.8612	47.2686
P6	24	upper	25.8165	31.9834	47.7461
P1	9	middle	47.4655	32.1446	46.6127
P2	12	middle	56.6518	31.3591	49.7654
P3	15	middle	54.6683	31.1288	51.5499
P4	18	middle	57.7441	30.6091	52.8147
P5	21	middle	58.8466	30.1381	55.5429
P6	24	middle	59.6045	29.4891	56.0615
P1	9	lower	64.2775	30.8557	52.1115
P2	12	lower	70.5429	30.2083	52.9244
P3	15	lower	79.5161	29.513	55.8895
P4	18	lower	79.4167	28.9954	58.0764
P5	21	lower	80.4453	28.8182	59.6668
P6	24	lower	82.4624	28.2565	60.343
Note: The LI, T and RH are average of 2019 and 2020

## Sheet: Fig.7 data
Treatment	Layer	LI	T	RH	BN / plant	BN / m2	BW /g	BSR /%
P1	upper	24.8315	36.3503	36.4493	5.15	46.35	6.415	44.765
P2	upper	26.5404	35.4646	39.5473	4.28	51.4	6.55	41.435
P3	upper	26.9885	34.3157	42.1591	3.285	49.25	6.665	45.13
P4	upper	28.3777	33.6671	43.7989	2.735	49.2	6.69	40.79
P5	upper	28.2212	32.8612	47.2686	1.515	31.85	6.295	28.915
P6	upper	25.8165	31.9834	47.7461	0.935	22.4	5.805	22.295
P1	middle	47.4655	32.1446	46.6127	4.65	41.85	6.96	50.29
P2	middle	56.6518	31.3591	49.7654	4.67	55	7.06	59.275
P3	middle	54.6683	31.1288	51.5499	3.615	54.25	7.175	59.885
P4	middle	57.7441	30.6091	52.8147	3.55	63.9	7.2	57.465
P5	middle	58.8466	30.1381	55.5429	2.765	58.1	6.885	48.6
P6	middle	59.6045	29.4891	56.0615	2.435	58.4	6.8	41.49
P1	lower	64.2775	30.8557	52.1115	5.1	45.9	6.1	66.53
P2	lower	70.5429	30.2083	52.9244	4.93	59.2	6.41	71.815
P3	lower	79.5161	29.513	55.8895	4.48	67.5	6.905	76.48
P4	lower	79.4167	28.9954	58.0764	3.815	68.7	6.635	70.89
P5	lower	80.4453	28.8182	59.6668	3.485	73.15	6.115	68.235
P6	lower	82.4624	28.2565	60.343	2.9	69.6	6.25	61.645
Note: The above parameters are 2-year averages
Upper layer
	LI	T	RH	Boll number / per plant	Boll number / m2	BW	BSR
LI	1
T	-0.457	1
RH	0.539	-.989**	1
Boll number /plant	-0.454	.996**	-.995**	1
Boll number / m2	0.081	0.783	-0.761	.812*	1
BW	0.387	0.584	-0.535	0.609	.936**	1
BSR	-0.092	.849*	-.842*	.876*	.958**	.881*	1
Middle layer
	LI	T	RH	Boll number / per plant	Boll number / m2	BW	BSR
LI	1
T	-.883*	1
RH	.897*	-.980**	1
Boll number / plant	-0.723	.941**	-.952**	1
Boll number / m2	.912*	-0.752	0.78	-0.607	1
BW	-0.151	0.447	-0.37	0.462	0.189	1
BSR	-0.175	0.563	-0.469	0.616	0.066	.927**	1
Lower layer
	LI	T	RH	Boll number / per plant	Boll number / m2	BW	BSR
LI	1
T	-.954**	1
RH	.921**	-.981**	1
Boll number /plant	-.860*	.970**	-.978**	1
Boll number / m2	.967**	-.908*	.882*	-0.797	1
BW	0.337	-0.085	-0.025	0.137	0.303	1
BSR	-0.026	0.312	-0.361	0.524	0.071	0.786	1
* At the 0.05 level (two-tailed), the correlation is significant.
** At the 0.01 level (two-tailed), the correlation is significant.

[truncated: 1 more sheets: Fig.8 Yield]
